# 1 **Emergence of the subapical domain is associated with the midblastula** 2 **transition**

3 Anja Schmidt (2), Jörg Großhans (1,2)

4 (1) Professur für Entwicklungsgenetik, Fachbereich Biologie, Philipps-Universität  
5 Marburg, Karl-von-Frisch-Straße 8, 35043 Marburg, Germany

6 (2) Institut für Entwicklungsbiochemie, Universitätsmedizin, Georg-August-  
7 Universität Göttingen, Justus-von-Liebig-Weg 11, 37077 Göttingen, Germany

8 **Key words:** cortical domains, epithelial domains, subapical, Canoe, midblastula  
9 transition, zygotic genome activation

## 10 **Abstract**

11 Epithelial domains and cell polarity are determined by polarity proteins which are  
12 associated with the cell cortex in a spatially restricted pattern. Early *Drosophila*  
13 embryos are characterized by a stereotypic dynamic and de novo formation of cortical  
14 domains. For example, the subapical domain emerges at the transition from syncytial  
15 to cellular development during the first few minutes of interphase 14. The dynamics  
16 in cortical patterning is revealed by the subapical markers Canoe/Afadin and ELMO-  
17 Sponge, which widely distributed in interphase 13 but subapically restricted in  
18 interphase 14. The factors and mechanism determining the timing for the emergence  
19 of the subapical domain have been unknown. In this study, we show, that the restricted  
20 localization of subapical markers depends on the onset of zygotic gene expression. In  
21 contrast to cell cycle remodeling, the emergence of the subapical domain does not  
22 depend on the nucleo-cytoplasmic ratio. Thus, we define cortical dynamics and

23 specifically the emergence of the subapical domain as a feature of the midblastula  
24 transition.

## 25 **Author summary**

26 Midblastula transition is a paradigm of a developmental transition. Multiple processes  
27 such as cell cycle, cell mobility, onset of zygotic gene expression, degradation of  
28 maternal RNA and chromatin structure are coordinated to lead to defined changes in  
29 visible morphology. The midblastula transition in *Drosophila* embryos is associated  
30 with a change from fast nuclear cycles to a cell cycle mode with gap phase and slow  
31 replication, a strong increase in zygotic transcription and cellularization. The timing  
32 of the processes associated with the midblastula transition are controlled by the onset  
33 of zygotic gene expression or the nucleocytoplasmic ratio. Here we define the  
34 patterning of cortical domains, i. e. the emergence of a subapical domain as a novel  
35 feature of the midblastula transition whose appearance is controlled by the onset of  
36 zygotic transcription but not the nucleocytoplasmic ratio. Our findings will help to  
37 gain further understanding of the coordination of complex developmental processes  
38 during the midblastula transition.

## 39 **Introduction**

40 The cell cortex underlies the plasma membrane and consists of a layer of F-actin and  
41 associated proteins, including actin nucleators, regulators and myosin motors.  
42 Proteins, such as ERM proteins, link F-actin to the plasma membrane (1). Typical for  
43 epithelial cells are cortical domains, which contain marker proteins specific for the  
44 respective domain in addition to the general set of cortical proteins. For example, Par-  
45 3/Bazooka (Baz) typically marks the subapical domain, whereas Par-1 marks the  
46 lateral domain (2,3). Although mutual exclusion of such marker proteins has been  
47 shown to maintain boundaries between two domains in some cells, the mechanism for

48 initial establishment of the domains and pattern formation is not well defined. The de  
49 novo appearance of the first epithelium during cellularization in *Drosophila* embryos,  
50 provides an excellent model to study the initial formation of cortical domains and  
51 epithelial polarization (4).

52 Following a syncytial phase of development with rapid nuclear cycles typical for  
53 insects, the first epithelium forms after about two hours of embryonic development as  
54 a morphologically obvious feature marking the transitions from syncytial to cellular  
55 blastoderm (5–7). This morphological change, often referred to as midblastula  
56 transition (MBT) is associated with several cellular processes that appear to be  
57 coordinated, including remodeling of the cell cycle, transition to a slow mode of DNA  
58 replication, heterochromatin formation, ingression of the cellularization furrow,  
59 elongation of the nuclei, and importantly activation of the zygotic genome (6,8,9).  
60 Concerning epithelial polarization it is important to note that the number of cortical  
61 domains increases during the transition from two cortical domains (caps and intercaps)  
62 in interphase 13 (10,11) and three domains (apical, lateral, basal) during mitosis (12)  
63 to the typical four domains. A dedicated subapical region positioned between the  
64 apical and lateral domains emerges for the first time in development in interphase 14  
65 (3,8).

66 It is unknown, if and how the emergence of the subapical domains is linked or  
67 coordinated with the other processes associated with the midblastula transition. It has  
68 been previously shown that zygotic transcription initiates the cell cycle remodeling  
69 and is required for cellularization (13). The changes are due to specific zygotic genes,  
70 e. g. *slam*, *nullo*, *frs* or to global signals such as transcription associated DNA  
71 replication stress and DNA checkpoint activation (13). The emergence of the subapical  
72 domain has not been investigated in this context, so far.

73 The earliest marker proteins for the prospective subapical domain during onset of  
74 cellularization are Canoe (Cno, Afadin in vertebrates) and the unconventional GEF  
75 complex ELMO- Sponge (8,14), which act upstream of Canoe possibly via control of  
76 the small GTPase Rap1. Both Canoe and ELMO-Sponge are widely distributed during  
77 the syncytial interphases and mitoses (nuclear cycles 10–13). Canoe is detected in cap  
78 and intercap regions, whereas the ELMO-Sponge complex marks the actin caps and  
79 control their formation (8). This disc-like pattern in pre-MBT interphases changes to  
80 a ring-like pattern in interphase 14, when ELMO-Sponge initiate restriction of Canoe  
81 to the prospective subapical region. Only during the course of cellularization, the  
82 typical subapical proteins Bazooka/Par-3 and Armadillo (Arm,  $\beta$ -Catenin in  
83 vertebrates) are enriched in the subapical region (15–17).

84 In this study, we investigate the role of zygotic gene expression and cell cycle  
85 remodeling for the formation of the subapical domain. As Bazooka feeds back on  
86 subapical restriction of Canoe later in cellularization, we tested the function of this  
87 genetic interaction for the initial emergence of the subapical region. We show that the  
88 localization of early subapical domain markers like ELMO-Sponge and Canoe  
89 depends on onset of zygotic expression but not cell cycle remodeling and not on  
90 *bazooka* during early cellularization.

## 91 **Results**

### 92 **Change of Canoe distribution pattern at the onset of interphase 14**

93 The subapical cortical domain emerges during the transition from syncytial to cellular  
94 blastoderm for the first time during embryonic development. During this process the  
95 localization pattern of the actin binding protein Canoe changes from a dispersed  
96 pattern at the actin caps to a coalesced pattern at the prospective subapical domain  
97 within about five minutes of the onset of cellularization in interphase 14 (Figure 1A)

98 (8). Subapical restriction of Canoe depends on the small GTPase Rap1 and the  
99 unconventional guanyl nucleotide complex ELMO-Sponge, which undergoes a  
100 relocation from discs in interphase 13 to rings in interphase 14 (8). New  
101 cellularization furrows form between the daughter nuclei. After reached longest  
102 extension in metaphase, these furrows gradually retract in the second half of mitosis  
103 to a length of about 3  $\mu\text{m}$  (32,33) (Figure 1B). We applied our live imaging assay with  
104 embryos expressing the subapical marker CanoeYFP and basal marker CherrySlam to  
105 reveal the kinetics of marker segregation. Axial stacks were recorded and  
106 computationally projected to sagittal sections. During mitosis, Cherry Slam was  
107 detected at the tip of the metaphase furrow, whereas CanoeYFP was spread along the  
108 full length (Figure 1C). It is important to note the difference between “old”  
109 cellularization furrows, which arise from retracting metaphase furrows, and “new”  
110 cellularization furrows, which ingress between daughter nuclei. In “new”  
111 cellularization furrows CanoeYFP associates within minutes to the in folding  
112 membrane. In contrast, Canoe distribution is becomes subapically restricted at “old”  
113 furrows starting from a wide distribution along the furrow (Figure 1C). CherrySlam  
114 remains at the tip of “old” furrows, and gradually appears at the tip of “new” furrows  
115 (Figure 1C) (8). Although we and others have uncovered the mechanism for subapical  
116 restriction of Canoe (3,8,15,17,34), the factors determining the timing have not be  
117 studied.

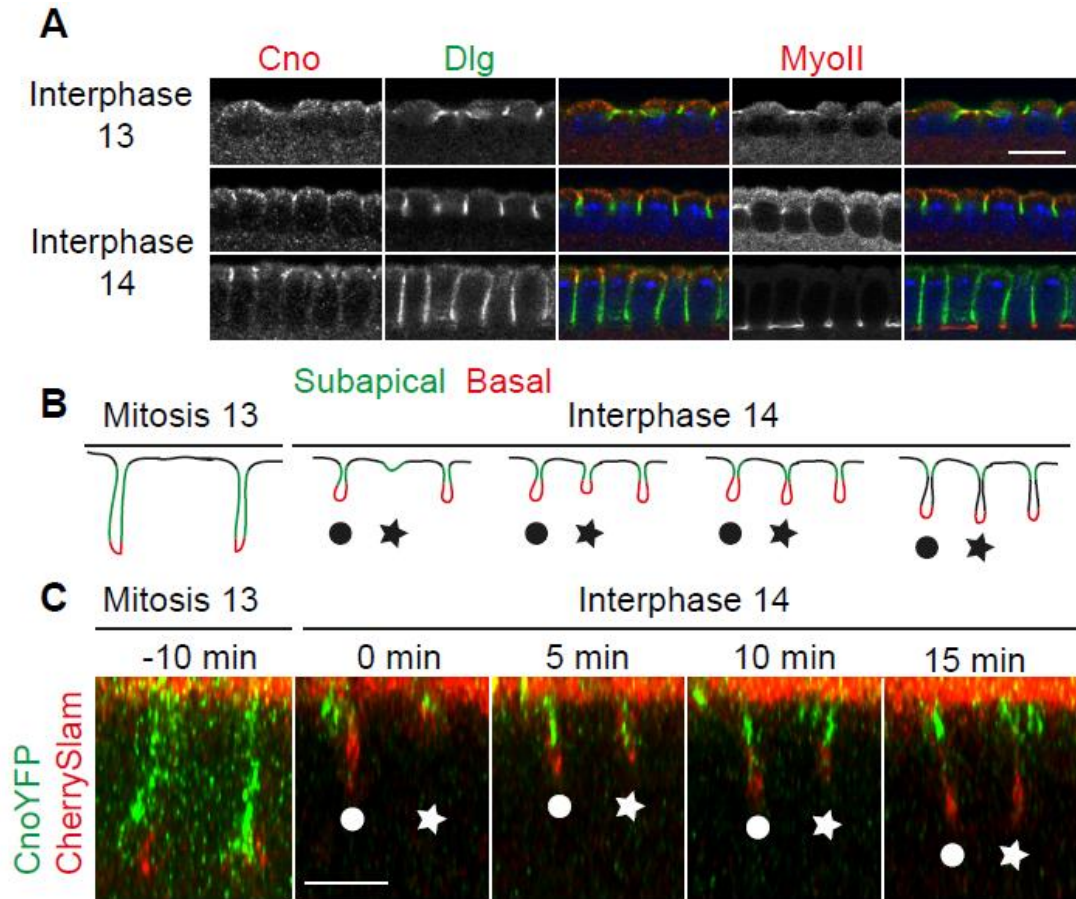

Figure 1 Canoe relocates in old cellularization furrows arising from retracting metaphase furrows. (A) Fixed wild type embryos during interphases 13 and 14 as indicated stained against Canoe (grey/red), Dlg (grey/ green), MyosinII (grey/ red) and DNA (blue). (B) Scheme of metaphase and cellularization furrows during mitosis 13 and switch to interphase 14 as indicated. Proteins localizing to the subapical domain during interphase 14 (green) localize to the whole cortex of metaphase furrows. After mitosis 13 metaphase furrows retract and come to a halt forming “old furrows” (circle) while “new furrows” form between (star). The furrows move inwards synchronously when they have reached the same length. (C) Living embryos expressing CanoeYFP (green) and CherrySlam (red) to mark subapical and basal domains. Orthogonal views are shown. Stages are as indicated. Scale bar 10  $\mu$ m.

118 **Formation of the subapical domain depends on zygotic gene expression but not**  
119 **the nucleo-cytoplasmic ratio**

120 The change from syncytial to cellular blastoderm at the onset of cell cycle 14 and  
121 cellularization requires zygotic gene expression (35). Although it is clear that  
122 cellularization depends on zygotic gene expression, its functional relationship to the  
123 emergence of the subapical domain has not been investigated. ELMO, Sponge, Rap1  
124 and Canoe are maternally derived proteins, whose total levels are assumed not to  
125 change much. Rather, their distribution on the plasma membrane is controlled by post-  
126 translational mechanisms.

127 We first asked whether the spatial restriction of subapical markers depended on zygotic  
128 transcription. We analyzed embryos, in which zygotic transcription was blocked by  $\alpha$ -  
129 amanitin, an efficient inhibitor of RNA polymerase II. Injection of  $\alpha$ -amanitin impairs  
130 furrow invagination and cellularization (35). Early embryos expressing CanoeYFP  
131 were injected with  $\alpha$ -amanitin prior to cellularization (Figure 2A). In fixed control  
132 embryos, Sponge and CanoeYFP marked the invaginating furrows in a hexagonal  
133 pattern, enclosing the nuclei as visible in surface views (Figure 2A). In contrast, no  
134 spatial restriction of Sponge and CanoeYFP was detected in injected embryos in  
135 interphase 14, indicating that the restriction of the subapical markers depends on  
136 zygotic transcription (Figure 2B). To better resolve the dynamics and staging of the  
137 embryos, we recorded time lapse images of embryos expressing ELMO-GFP (Figure  
138 2C-D). Control embryos showed a stereotypic ELMO localization at caps during  
139 syncytial blastoderm stages and transition to subapical rings during the first few  
140 minutes of cellularization in interphase 14 (Figure 2C). In embryos treated with  $\alpha$ -  
141 amanitin, the cap staining during syncytial blastoderm stage was comparable to control  
142 embryos. In contrast, the ELMO-GFP signal remained widely distributed over the  
143 whole cortex without any obvious spatial restriction after mitosis 13 (Figure 2D). This



144 loss of restriction of ELMO-GFP was observed at a time when the morphologically  
145 visible furrows has not yet formed in control embryos. Our data indicate that spatial  
146 restriction of ELMO, Sponge and Canoe in interphase 14 and thus formation of the  
147 subapical domain depends on zygotic transcription.

148

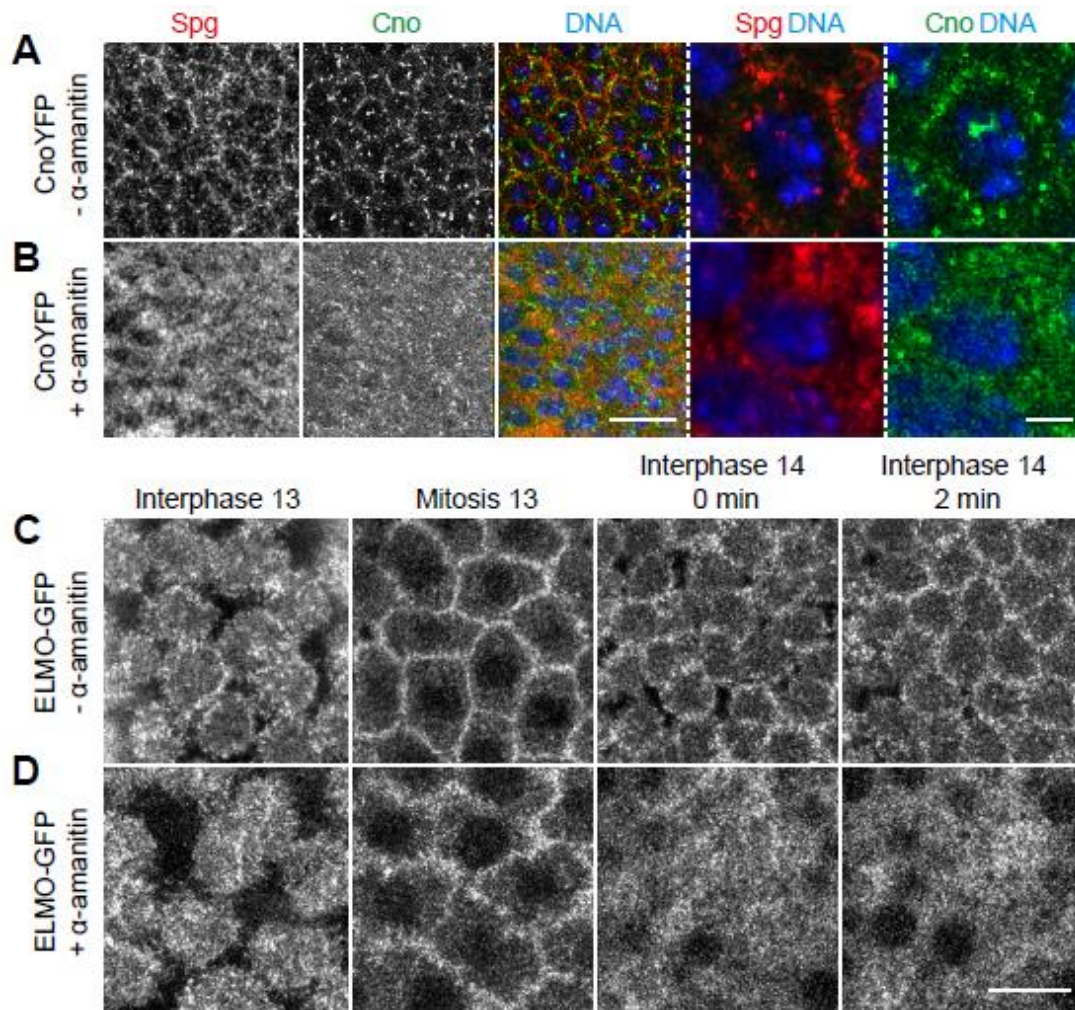

149

150 Figure 2 Zygotic gene expression is necessary for the formation of the subapical domain during  
151 cellularization. (A, B) Fixed non-injected (A) and  $\alpha$ -amanitin-injected (B) embryos expressing  
152 CanoeYFP stained against Sponge (grey/ red), CanoeYFP (grey/ green) and DNA (grey/ blue)  
153 during interphase 14. Merged images and zoom-ins are shown in right panels. (B, D) Top  
154 views of images from time lapse movies of non-injected (C) and  $\alpha$ -amanitin-injected (D)



155 embryos expressing ELMO-GFP. Time points are indicated above the images. Scale bars 10  
156  $\mu\text{m}$ .

157 A second obvious timing mechanism beside onset of zygotic transcription during the  
158 transition from syncytial to cellular blastoderm is the nucleocytoplasmic ratio. Haploid  
159 embryos undergo an extra nuclear division and cellularize only in interphase 15 (36)  
160 (Figure 3C, D). It was previously reported that haploid embryos showed features of a  
161 cellularization furrow already in interphase 14, i. e. transient basal accumulation of  
162 Myo II at the furrow tip (37,38). Cortical domains have otherwise not been specifically  
163 investigated in haploid embryos, yet. We fixed and stained haploid embryos from  
164 *sésame* (*ssm*, *Hira*) females (21) for Canoe and F-actin. We detected specific subapical  
165 restriction of Canoe in cellularizing embryos in interphase 14 as well as in interphase  
166 15 (Figure 3 C, D). Consistent with the previously reported basal restriction of MyoII,  
167 these data suggest that the transient furrow during interphase 14 in haploid embryos  
168 contains a patterned cortex with a subapical region. We conclude that the emergence  
169 of the subapical and basal domains does not depend on the nucleocytoplasmic ratio.

170 A third timer associated with the midblastula transition is the remodeling of the fast  
171 nuclear cycle to a slow cell cycle, which depends on the onset of zygotic transcription  
172 (7). We tested whether subapical Canoe restriction would respond to a precocious  
173 zygotic transcription and precocious cell cycle remodeling. We analyzed embryos  
174 from *RPII215<sup>X161</sup>* germline clones, which precociously start zygotic transcription,  
175 cellularize already in interphase 13, and further develop with half of the number of  
176 nuclei (9). By staining of fixed embryos, we detected a normal pattern of F-actin and  
177 subapical restriction of Canoe in embryos cellularizing in interphase 13 (Figure 3A,  
178 B).

179 In summary, our data indicate that the formation of the subapical domain is a regulated  
180 feature of the midblastula transition, which responds to zygotic gene expression but  
181 not on the nucleocytoplasmic ratio. The failed spatial restriction in embryos with  
182 impaired zygotic transcription may be due to the absence of one or multiple specific  
183 zygotic factors, which control the distribution pattern of ELMO- Sponge complex, for  
184 example. Alternatively, failed spatial restriction may be a consequence of zygotic  
185 transcription, such as high polymerase activity or transcription dependent DNA  
186 replication stress. Although our time lapse analysis of ELMO-GFP and CanoeYFP  
187 indicates that subapical restriction precedes furrow ingression, we do not exclude the  
188 possibility that subapical restriction is a consequence of furrow formation due to the  
189 limited resolution of our assay.

190

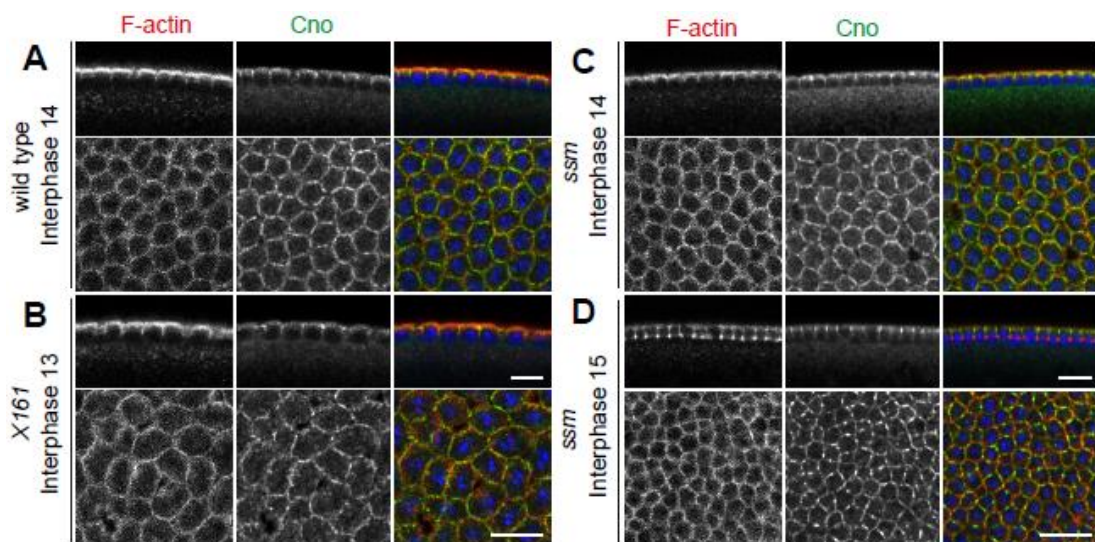

191

192 Figure 3 Cortical domain formation depends on zygotic gene expression and not on  
193 nucleocytoplasmic ratio. (A-D) Fixed wild type (A), *X161* (B) and *sésame* (C, D) embryos  
194 stained against F-actin (grey/ red), Canoe (grey/ green) and DNA (blue). Merged images are  
195 shown in right panels, sagittal sections in top panels and accompanying top views in lower  
196 panels. Stages are as indicated. Scale bars 10  $\mu$ m.

197 **Bazooka does not regulate subapical Canoe localization during early**  
198 **cellularization**

199 Bazooka is a potential zygotic factor controlling subapical restriction of ELMO-  
200 Sponge and Canoe, since Bazooka has a maternal and zygotic expression. Previous  
201 work revealed a positive feedback mechanism during late cellularization in which  
202 subapical restriction of Canoe becomes partially dependent on *bazooka* (15). We asked  
203 whether this feedback interaction was active also during the onset of cellularization.  
204 Firstly, we analyzed the distribution of Bazooka and Armadillo which marks E-  
205 Cadherin junctions in fixed wild type embryos. For this overview, we imaged all  
206 embryos with the same laser settings to compare protein localization and amounts in  
207 different stages. With these settings, we did not detect Bazooka at Armadillo positive  
208 metaphase furrows during mitosis 13 (Figure 4A). The subapical restriction of  
209 Armadillo matures during the course of cellularization starting from an initially wide  
210 distribution along the furrow. The basal junction, in comparison, was detected very  
211 early on as reported previously (3,39)(Figure 4B–D). A clear subapical Bazooka  
212 restriction was first detected during cellularization when the furrows extended to  
213 around half the length of the elongated nuclei (Figure 4D). Remarkably, at this time  
214 point subapical Armadillo enrichment was not visible yet. During the course of  
215 cellularization Bazooka puncta persisted at the subapical position colocalizing with  
216 Armadillo (3,40) (Figure 4E, F). The lack of a subapical Bazooka signal during early  
217 cellularization does not support an early function of the feedback regulation on Canoe.

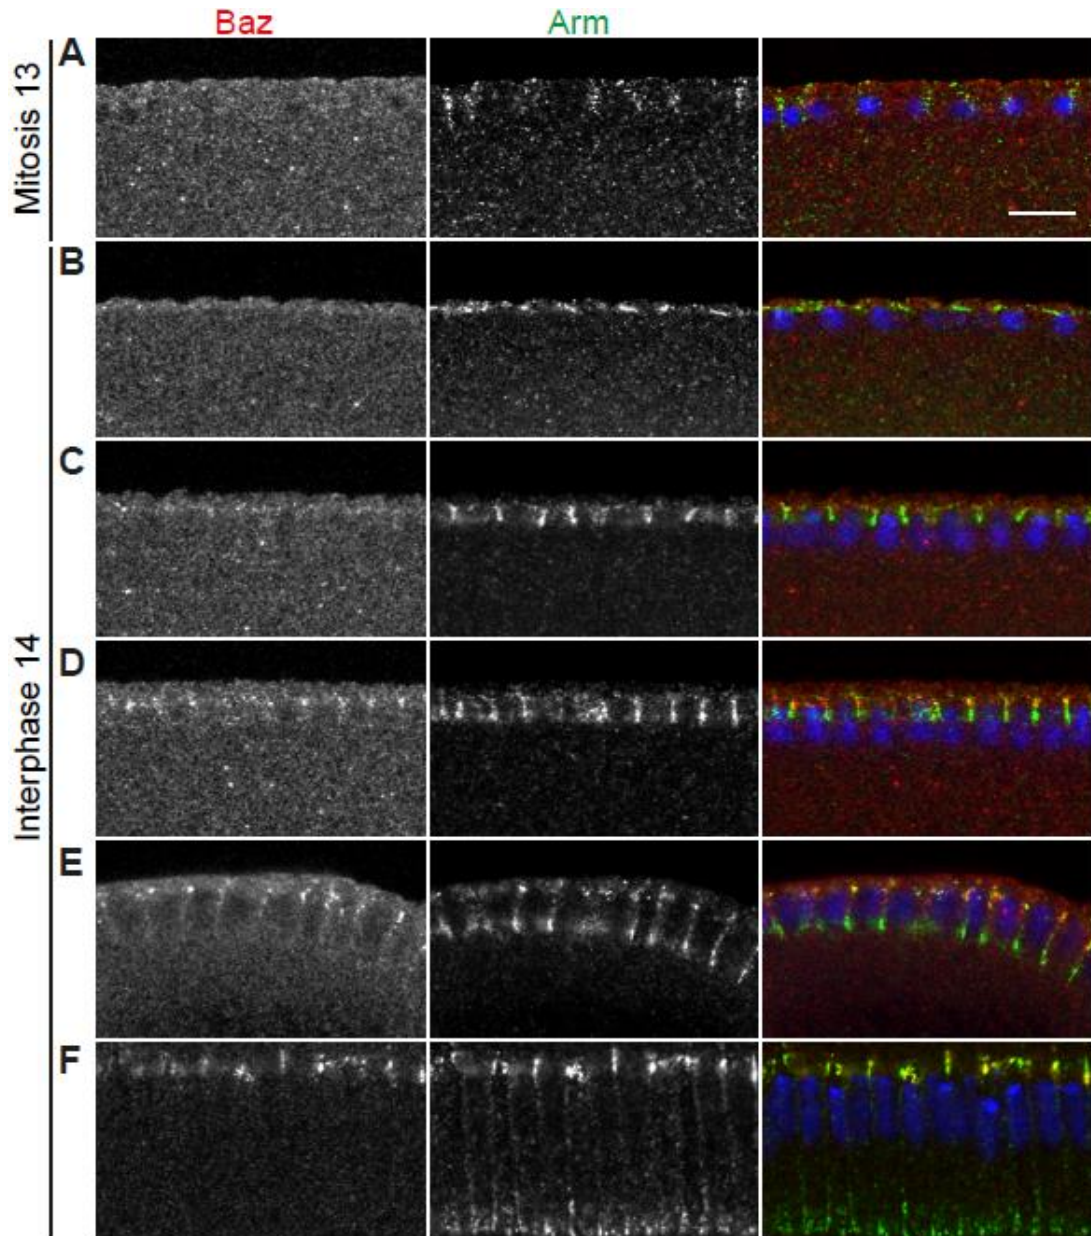

218

219 Figure 4 Subapical enrichment of Bazooka and Armadillo during cellularization. (A-F) Fixed  
220 wild type embryos during mitosis 13 (A) and interphase 14 (B-F, from early to late  
221 cellularization). Embryos were stained in the same tube against Bazooka (grey/red), Armadillo  
222 (grey/ green) and DNA (blue) and imaged with same laser settings to estimate different protein  
223 amounts in different stages. Scale bar 10  $\mu$ m.

224 To clarify the relation of Canoe and Bazooka in functional terms, we depleted *bazooka*  
225 by RNAi and analyzed fixed and stained embryos (Figure 5). RNAi depletion is  
226 functional as indicated by the loss of Bazooka staining and the later phenotype with



227 holes in the amnioserosa (Supplemental figure 1). Subapical Canoe enrichment was  
228 comparable in wild type controls and *bazookaRNAi* embryos during early  
229 cellularization whereas Canoe localization was affected as described before in early  
230 gastrulating embryos (15) (Supplemental figure 1B). Based on these data we conclude  
231 that the Bazooka-Canoe feedback loop becomes activated only during the course of  
232 cellularization and is not involved in the initial subapical restriction of Canoe.

233

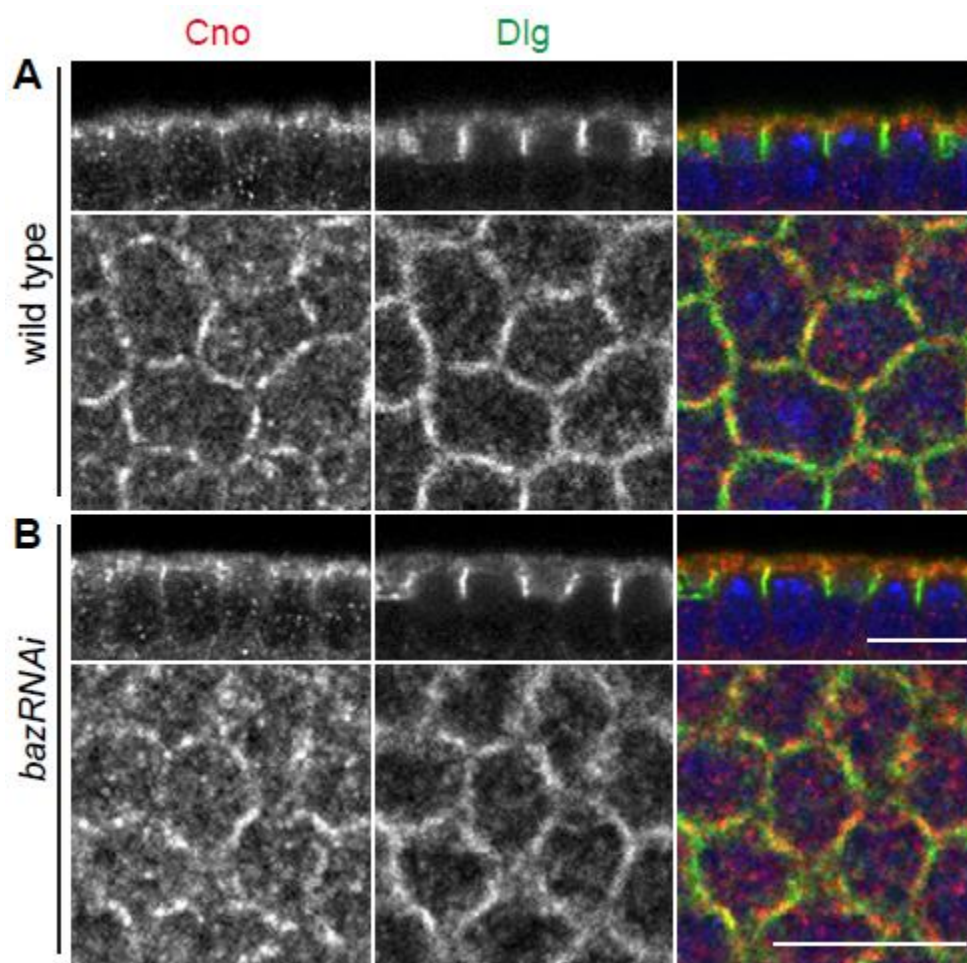

234

235 Figure 5 Canoe localization is not affected by Bazooka during early cellularization. (A-B)  
236 Fixed wild type (A) and *bazRNAi* (B) embryos during early cellularization stained against  
237 Canoe (grey/ red), Dlg (grey/ green) and DNA (blue). Side views are shown in upper panels  
238 and corresponding top views in lower panels. Scale bars 10  $\mu$ m.

239 **Subapical Bazooka enrichment is controlled by the unconventional GEF ELMO-**

240 **Sponge**

241 Initial subapical restriction of Canoe is controlled by the unconventional GEF complex  
242 ELMO-Sponge and the GTPase Rap1. We asked whether this functional dependence  
243 also holds true for Bazooka and Armadillo. By analysis of fixed embryos, we found  
244 that both *Rap1* and *ELMO* were required for subapical restriction of both Bazooka and  
245 Armadillo. Bazooka and Armadillo staining was dispersed along the lateral furrow in  
246 embryos from females with ELMO as well as Rap1 germline clones consistent with  
247 previous reports (15) (Figure 6B, D). Conversely Bazooka and Armadillo did not  
248 depend on a different Rap1GEF, *dizzy*, (Figure 6C) consistent with our previous report  
249 that subapical restriction of Canoe did not depend on *dizzy* (8). These findings confirm  
250 the earlier described pathway of Bazooka being downstream of the unconventional  
251 Rap1 GEF complex ELMO-Sponge, Rap1GTPase and Canoe during early and late  
252 cellularization.



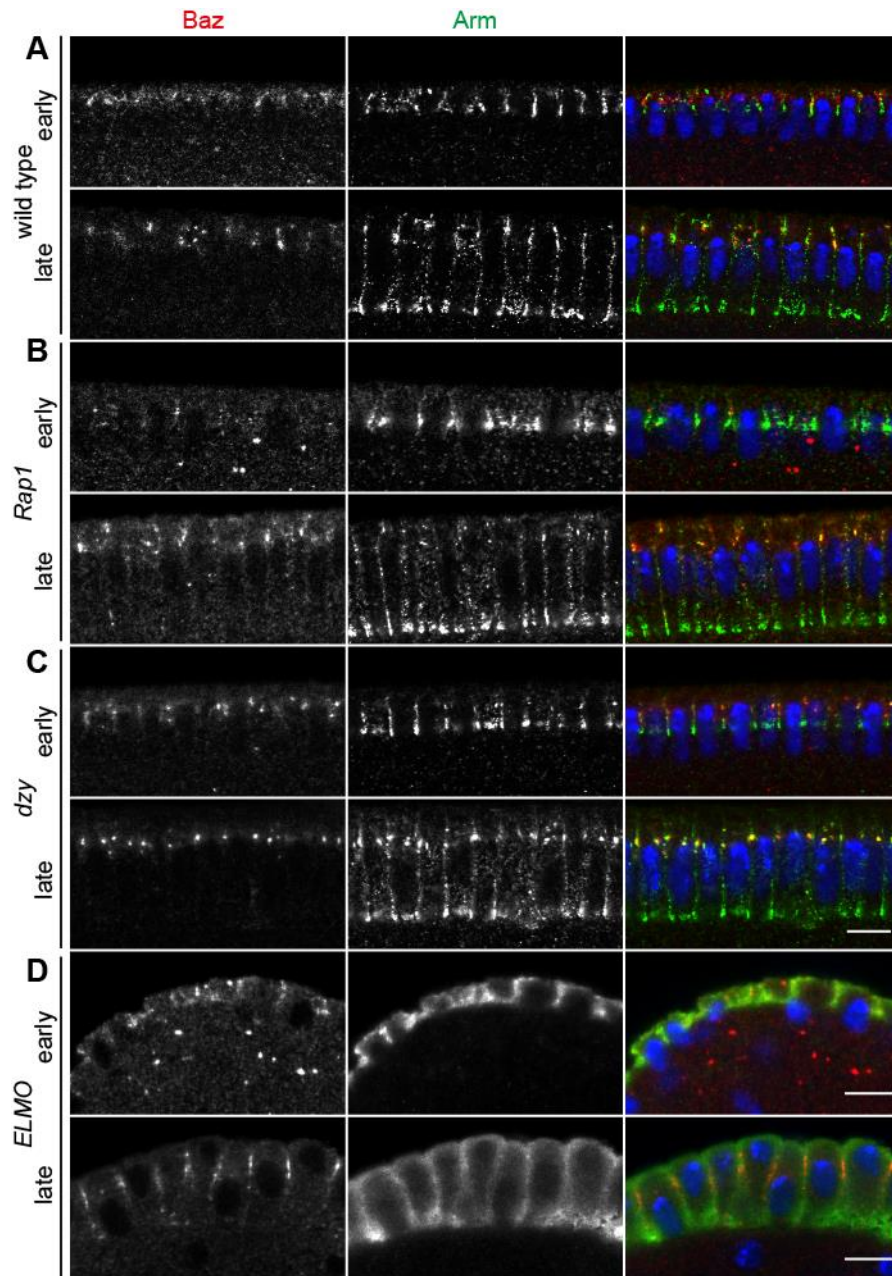

253

254 Figure 6 Subapical enrichment of Baz and Arm is perturbed in *Rap1* and *ELMO* but not in *dzy*  
255 mutants. (A–D) Fixed cellularizing wild type (A), *Rap1* (B), *dzy* (C) and *ELMO* (D) embryos  
256 stained against Baz (grey/ red), Arm (grey/ green). DNA is shown in blue. (A) Wild type  
257 embryos during early and late cellularization showed subapical Baz and Arm enrichment. (B)  
258 Baz puncta are spread along the lateral membrane in early and late cellularization of *Rap1*  
259 embryos. The subapical Arm enrichment was lost whereas basolateral enrichment was still  
260 visible. (C) The subapical enrichment of Baz and Arm is not perturbed in early and late

261 cellularizing *dzy* mutant embryos. (D) Baz and Arm subapical localization is lost in *ELMO*  
262 mutants during early and late cellularization. Scale bars 10  $\mu\text{m}$ .

## 263 **Discussion**

264 In this study we focused on the function of zygotic gene expression on the formation  
265 of the subapical domain during onset of cellularization. Next to the already known  
266 fact, that ELMO-Sponge and Canoe localize to newly forming cellularization furrows  
267 at onset of interphase 14 (8), we were able to show, that Canoe quickly changes its  
268 distribution pattern at “old” cellularization furrows (Figure 7). Although we were able  
269 to show Canoe preceding Bazooka to localize to the newly forming furrow and  
270 subapical domain, with Bazooka being gradually enriched at the subapical domain  
271 during the course of cellularization, we confirmed that Canoe is initially restricted  
272 independently of Bazooka. In this analysis we relayed on RNAi mediated depletion,  
273 since *bazooka* has an essential early function in germline determination (41–43).

274 The features of the midblastula transition include deceleration and remodeling of the  
275 cell cycle, degradation of maternal products and the switch from syncytial to a cellular  
276 blastoderm and the onset of zygotic gene expression (13,36,44,45). As new feature of  
277 the morphological changes associated with the midblastula transition we describe here  
278 a change in cortical patterning, i. e. the emergence of the subapical domain. Although  
279 the restriction of subapical markers precedes formation of a morphologically visible  
280 furrow, the apposition of two plasma membranes in initial furrow formation could be  
281 the cause of marker restriction, given the limited morphological resolution of our  
282 assays. A hint could come from the “old” cellularization furrows that arise from  
283 metaphase furrows, which were still detectable in  $\alpha$ -amanitin injected embryos by  
284 ELMO-GFP. Even at the positions of the old furrow the spatial restriction is lost. A  
285 limitation to this argument is again the limited insight into the cellular morphology

286 and dynamics, as the dynamics of the metaphase furrow in embryos lacking zygotic  
287 transcription is not clear. A more defined insight into the timing by zygotic gene  
288 expression comes from our investigations of embryos with precocious onset of zygotic  
289 gene expression. We could detect Canoe at forming cellularization furrows whenever  
290 zygotic gene expression was initiated.

291 The next arising question is which zygotic gene or genes could be responsible for  
292 relocation of the subapical domain proteins with onset of cellularization. Among  
293 the described early zygotic genes like *slam*, *nullo*, *bottleneck* and *serendipity- a* no  
294 such phenotypes have been described yet (8,18,46–48). However, as general  
295 morphology was the primary assay for the screen of zygotic genes (49,50), the  
296 subapical determinant might have been missed. A molecular screen of aneuploid  
297 embryos for mislocalization of subapical domain proteins may allow the identification  
298 of these genes, for example. Although *bazooka* is already maternally expressed, it  
299 seems to take over the function as the subapical determinant only later during in  
300 cellularization (15,16). Although, it is not clear how much the expression levels were  
301 reduced in *bazookaRNAi* embryos, we were not able to detect Bazooka protein by  
302 staining.

303 Taken together, we were able to show, that the formation of the newly established  
304 subapical domain is a novel feature of the midblastula transition, which depends on  
305 the onset of zygotic transcription. We propose the hypothesis, that a yet unknown  
306 zygotic gene triggers the signaling cascade for subapical domain formation involving  
307 ELMO-Sponge, Rap1 and Canoe.

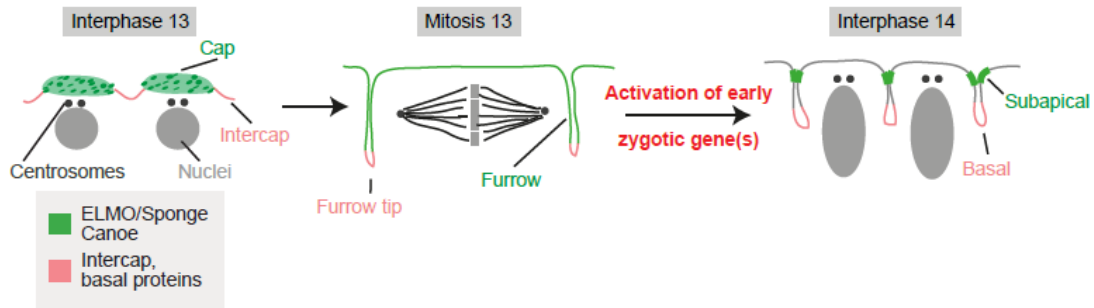

308

309 Figure 7 Model of cortical domain protein dynamics from interphase 13 to interphase 14.  
310 During interphase 13 cortical domain proteins divide in cap (green) and intercap (red)  
311 localization, later subapical proteins like Canoe localize to the whole metaphase furrow during  
312 mitosis 13 (green), whereas basal proteins (red) localize to the tip and stay there with  
313 remodeling to cellularization furrows. With midblastula transition and onset of zygotic gene  
314 expression a yet unknown zygotic gene leads to the remodeling of future subapical proteins in  
315 old and new cellularization furrows and subapical domain formation is initiated.

## 316 **Materials and Methods**

### 317 **Fly stocks and handling**

318 Fly stocks used were CanoeYFP (*cno*[*CPTI000590*], Drosophila Genomics and  
319 Genetic Resources, Kyoto), UASp-CherrySlam driven by maternal Gal4 (18),  
320 *rap1*[*P5709*] (R. Reuter, University of Tübingen, Germany)(19) , *dizzy*(*Δ8*) (R.  
321 Reuter) (20), *RPII215*[*X161*] (9), *sésame* (*Hira*[*185b*]) (21); UASbazRNAi  
322 (Bloomington stock # 35002), maternal triple driver MTD-Gal4 (22). As wild type  
323 control *w*[*1118*] was used.

324 All fly stocks were provided by the Drosophila Stock Center, Bloomington, if not  
325 stated differently. Genetic markers and annotations are described in Flybase  
326 (<http://flybase.org>)(23). All crosses and cages were kept at 25°C. Germ line clones  
327 were produced with the *ovo*/Flipase technique as described previously (24). *bazooka*

328 was depleted by overexpression of a short hairpin RNA with MTD-Gal4 during  
329 oogenesis.

### 330 **Immunostainings and antibodies**

331 Following primary antibodies were employed: mouse anti-Armadillo (1:50; N27A1,  
332 Hybridoma Center); rabbit anti-Bazooka (1:1000; A. Wodarz)(25); rabbit anti-Canoe  
333 (1:1000; (15)); mouse anti-Dlg (1:100; 4F3, Hybridoma Center); guinea pig anti-  
334 Sponge (1:1000; (26)). F-actin was stained by Phalloidin coupled to Alexa647  
335 (Thermo Fisher). Secondary antibodies were labeled with Alexa 488, 568, 647  
336 (Thermo Fisher). GFP tagged proteins was detected with GFP-booster coupled with  
337 Atto488 (1:500; Chromotek). DNA was stained by DAPI (0.2  $\mu$ g/ml; Thermo Fisher).

338 Embryos were fixed by 4% formaldehyde or by heat fixation using standard methods  
339 described previously (27) and stored in methanol at  $-20^{\circ}\text{C}$ . For F-actin staining with  
340 phalloidin and in the  $\alpha$ -amanitin experiments, embryos were fixed by 8%  
341 formaldehyde and manually released from the vitelline membrane. For staining,  
342 embryos were transferred to PBT (Phosphate buffered saline (PBS) + 0.2% Tween20),  
343 washed trice for 5 min and afterwards blocked for 30–60 min in PBT+5% bovine  
344 serum (BSA). Embryos were incubated with primary antibodies in PBT+0.1% BSA  
345 overnight at  $4^{\circ}\text{C}$  or for 2–3 h at room temperature. Afterwards the embryos were  
346 washed with PBT trice for 15 min, incubated with secondary antibodies in PBT for 1–  
347 2 h at room temperature and again washed  $3\times$  with PBT for 15 min and stained with  
348 DAPI for 10 min at room temperature. The embryos were mounted in Aquapolymount  
349 (Thermo Fisher).

350 Injection of  $\alpha$ -amanitin for inhibition of RNA polymerase II was conducted with a  
351 concentration of 1 mg/ml in water according to standard procedures as described  
352 before (28,29). Afterwards, the embryos were staged to reach interphase 14/15 and

353 fixed as described above. The vitelline membrane was manually removed prior to the  
354 staining procedure.

### 355 **Imaging and Software**

356 Imaging was performed with a Zeiss LSM780 confocal microscope equipped with an  
357 Airyscan detector unit. Fixed samples were imaged with an LCI Plan Neofluar  
358 63×/water NA 1.3 objective. Live imaging was conducted with a Plan Neofluar 63×/oil  
359 NA 1.4 objective. Embryos for live imaging were prepared as previously described  
360 (30). Fixed samples were imaged with a frame size of 512x512 pixel (67.5×67.5 μm;  
361 130 nm lateral pixel size) for top views and 512×200 pixel (96.4×29.4 μm; 190 nm  
362 lateral pixel size) for side views. Top views were conducted as z-stacks with a step  
363 size of 0.5 μm. Live imaging was conducted in the Airyscan mode with a frame size  
364 of 376×376 pixel (31.7×31.7 μm, 80 nm lateral pixel size). Top views were conducted  
365 as axial stacks with a step size of 0.25 μm. Orthogonal views were constructed in  
366 Fiji/ImageJ (31). Image were processed in Fiji/ ImageJ, Adobe Photoshop and  
367 Illustrator.

### 368 **Acknowledgement**

369 We are grateful to E. Geisbrecht, R. Reuter, M. Peifer and A. Wodarz for materials or  
370 discussions. We acknowledge service support from the Developmental Studies  
371 Hybridoma Bank created by NICHD of the NIH/USA and maintained by the  
372 University of Iowa, the Bloomington Drosophila Stock Center (supported by NIH  
373 P40OD018537). This work was in part supported by the Deutsche  
374 Forschungsgemeinschaft (DFG SPP1464 GR1945/4-2 and equipment grant  
375 INST1525/16-1 FUGG).



## 376 **References**

- 377 1. Honigmann A, Pralle A. Compartmentalization of the Cell Membrane. *J Mol*  
378 *Biol.* 2016 Dec 4;428(24, Part A):4739–48.
- 379 2. Bilder D, Schober M, Perrimon N. Integrated activity of PDZ protein complexes  
380 regulates epithelial polarity. *Nat Cell Biol.* 2003 Jan;5(1):53–8.
- 381 3. Harris TJC, Peifer M. The positioning and segregation of apical cues during  
382 epithelial polarity establishment in *Drosophila*. *J Cell Biol.* 2005 Aug  
383 29;170(5):813–23.
- 384 4. Schmidt A, Grosshans J. Dynamics of cortical domains in early *Drosophila*  
385 development. *J Cell Sci.* 2018 Apr 1;131(7):jcs212795.
- 386 5. Foe VE, Alberts BM. Studies of nuclear and cytoplasmic behaviour during the  
387 five mitotic cycles that precede gastrulation in *Drosophila* embryogenesis. *J Cell*  
388 *Sci.* 1983 May 1;61(1):31–70.
- 389 6. Foe VE, Odell GM, Edgar BA. Mitosis and morphogenesis in the *Drosophila*  
390 embryo: Point and counterpoint. In: *The Development of Drosophila*  
391 *melanogaster*, M Bate and A Martinez Arias. Cold Spring Harbor Laboratory;  
392 1993. p. 149–300.
- 393 7. Liu B, Grosshans J. Link of Zygotic Genome Activation and Cell Cycle Control.  
394 In: *Zygotic Genome Activation* [Internet]. Humana Press, New York, NY; 2017  
395 [cited 2017 Jul 27]. p. 11–30. (Methods in Molecular Biology). Available from:  
396 [https://link.springer.com/protocol/10.1007/978-1-4939-6988-3\\_2](https://link.springer.com/protocol/10.1007/978-1-4939-6988-3_2)

- 397 8. Schmidt A, Lv Z, Großhans J. ELMO and Sponge specify subapical restriction  
398 of Canoe and formation of the subapical domain in early *Drosophila* embryos.  
399 *Development*. 2018 Jan 15;145(2):dev157909.
- 400 9. Sung H, Spangenberg S, Vogt N, Großhans J. Number of Nuclear Divisions in  
401 the *Drosophila* Blastoderm Controlled by Onset of Zygotic Transcription. *Curr*  
402 *Biol*. 2013 Jan 21;23(2):133–8.
- 403 10. Warn RM, Bullard B, Magrath R. Changes in the distribution of cortical myosin  
404 during the cellularization of the *Drosophila* embryo. *Development*. 1980 Jun  
405 1;57(1):167–76.
- 406 11. Warn RM, Magrath R, Webb S. Distribution of F-actin during cleavage of the  
407 *Drosophila* syncytial blastoderm. *J Cell Biol*. 1984 Jan;98(1):156–62.
- 408 12. Mavrakakis M, Rikhy R, Lippincott-Schwartz J. Plasma membrane polarity and  
409 compartmentalization are established before cellularization in the fly embryo.  
410 *Dev Cell*. 2009 Jan;16(1):93–104.
- 411 13. Blythe SA, Wieschaus EF. Coordinating Cell Cycle Remodeling with  
412 Transcriptional Activation at the *Drosophila* MBT. *Curr Top Dev Biol*. 2015 Jan  
413 1;113:113–48.
- 414 14. Winkler F, Gummalla M, Künneke L, Lv Z, Zippelius A, Aspelmeier T, et al.  
415 Fluctuation Analysis of Centrosomes Reveals a Cortical Function of Kinesin-1.  
416 *Biophys J*. 2015 Sep 1;109(5):856–68.
- 417 15. Choi W, Harris NJ, Sumigray KD, Peifer M. Rap1 and Canoe/afadin are essential  
418 for establishment of apical-basal polarity in the *Drosophila* embryo. *Mol Biol*  
419 *Cell*. 2013 Apr;24(7):945–63.

- 420 16. Müller HA, Wieschaus E. armadillo, bazooka, and stardust are critical for early  
421 stages in formation of the zonula adherens and maintenance of the polarized  
422 blastoderm epithelium in *Drosophila*. *J Cell Biol.* 1996 Jul 1;134(1):149–63.
- 423 17. Sawyer JK, Harris NJ, Slep KC, Gaul U, Peifer M. The *Drosophila* afadin  
424 homologue Canoe regulates linkage of the actin cytoskeleton to adherens  
425 junctions during apical constriction. *J Cell Biol.* 2009 Jul 13;186(1):57–73.
- 426 18. Acharya S, Laupsien P, Wenzl C, Yan S, Großhans J. Function and dynamics of  
427 slam in furrow formation in early *Drosophila* embryo. *Dev Biol.* 2014 Feb  
428 15;386(2):371–84.
- 429 19. Knox AL, Brown NH. Rap1 GTPase Regulation of Adherens Junction  
430 Positioning and Cell Adhesion. *Science.* 2002 Feb 15;295(5558):1285–8.
- 431 20. Huelsmann S, Hepper C, Marchese D, Knöll C, Reuter R. The PDZ-GEF Dizzy  
432 regulates cell shape of migrating macrophages via Rap1 and integrins in the  
433 *Drosophila* embryo. *Development.* 2006 Aug 1;133(15):2915–24.
- 434 21. Loppin B, Docquier M, Bonneton F, Couble P. The Maternal Effect Mutation  
435 *sésame* Affects the Formation of the Male Pronucleus in *Drosophila*  
436 *melanogaster*. *Dev Biol.* 2000 Jun 15;222(2):392–404.
- 437 22. Mazzalupo S, Cooley L. Illuminating the role of caspases during *Drosophila*  
438 oogenesis. *Cell Death Differ.* 2006 Nov;13(11):1950.
- 439 23. Thurmond J, Goodman JL, Strelets VB, Attrill H, Gramates LS, Marygold SJ, et  
440 al. FlyBase 2.0: the next generation. *Nucleic Acids Res.* 2019 Jan  
441 8;47(D1):D759–65.

- 442 24. Chou TB, Noll E, Perrimon N. Autosomal P[ovoD1] dominant female-sterile  
443 insertions in *Drosophila* and their use in generating germ-line chimeras.  
444 *Development*. 1993 Dec 1;119(4):1359–69.
- 445 25. Wodarz A, Ramrath A, Kuchinke U, Knust E. Bazooka provides an apical cue  
446 for Inscuteable localization in *Drosophila* neuroblasts. *Nature*. 1999  
447 Dec;402(6761):544.
- 448 26. Biersmith B, Liu Z, Bauman K, Geisbrecht ER. The DOCK Protein Sponge Binds  
449 to ELMO and Functions in *Drosophila* Embryonic CNS Development. *PLOS*  
450 *ONE*. 2011 Jan 25;6(1):e16120.
- 451 27. Yan S, Acharya S, Gröning S, Großhans J. Slam protein dictates subcellular  
452 localization and translation of its own mRNA. *PLOS Biol*. 2017 Dec  
453 4;15(12):e2003315.
- 454 28. Liu B, Winkler F, Herde M, Witte C-P, Großhans J. A Link between  
455 Deoxyribonucleotide Metabolites and Embryonic Cell-Cycle Control. *Curr Biol*.  
456 2019 Apr 1;29(7):1187-1192.e3.
- 457 29. Yan S, Großhans J. Localization and translation control of slam in *Drosophila*  
458 cellularization. *Fly (Austin)*. 2018 Oct 2;12(3–4):191–8.
- 459 30. Kanesaki T, Edwards CM, Schwarz US, Grosshans J. Dynamic ordering of nuclei  
460 in syncytial embryos: a quantitative analysis of the role of cytoskeletal networks.  
461 *Integr Biol*. 2011 Nov 1;3(11):1112–9.
- 462 31. Schindelin J, Arganda-Carreras I, Frise E, Kaynig V, Longair M, Pietzsch T, et  
463 al. Fiji: an open-source platform for biological-image analysis. *Nat Methods*.  
464 2012 Jul;9(7):676–82.

- 465 32. Raff JW, Glover DM. Centrosomes, and not nuclei, initiate pole cell formation  
466 in *Drosophila* embryos. *Cell*. 1989 May 19;57(4):611–9.
- 467 33. He B, Martin A, Wieschaus E. Flow-dependent myosin recruitment during  
468 *Drosophila* cellularization requires zygotic *dunk* activity. *Dev Camb Engl*. 2016  
469 Jul 1;143(13):2417–30.
- 470 34. Bonello TT, Perez-Vale KZ, Sumigray KD, Peifer M. Rap1 acts via multiple  
471 mechanisms to position *Canoe* and adherens junctions and mediate apical-basal  
472 polarity establishment. *Development*. 2018 Jan 15;145(2):dev157941.
- 473 35. Edgar BA, Kiehle CP, Schubiger G. Cell cycle control by the nucleo-cytoplasmic  
474 ratio in early *Drosophila* development. *Cell*. 1986 Jan 31;44(2):365–72.
- 475 36. Lu X, Li JM, Elemento O, Tavazoie S, Wieschaus EF. Coupling of zygotic  
476 transcription to mitotic control at the *Drosophila* mid-blastula transition.  
477 *Development*. 2009 Jun 15;136(12):2101–10.
- 478 37. Großhans J, Wenzl C, Herz H-M, Bartoszewski S, Schnorrer F, Vogt N, et al.  
479 RhoGEF2 and the formin *Dia* control the formation of the furrow canal by  
480 directed actin assembly during *Drosophila* cellularisation. *Development*. 2005  
481 Mar 1;132(5):1009–20.
- 482 38. Großhans J, Müller HAJ, Wieschaus E. Control of Cleavage Cycles in *Drosophila*  
483 Embryos by *frühstart*. *Dev Cell*. 2003 Aug 1;5(2):285–94.
- 484 39. Hunter C, Wieschaus E. Regulated Expression of *nullo* Is Required for the  
485 Formation of Distinct Apical and Basal Adherens Junctions in the *Drosophila*  
486 Blastoderm. *J Cell Biol*. 2000 Jul 24;150(2):391–402.

- 487 40. Harris TJC, Peifer M. Adherens junction-dependent and -independent steps in the  
488 establishment of epithelial cell polarity in *Drosophila*. *J Cell Biol.* 2004 Oct  
489 11;167(1):135–47.
- 490 41. Doerflinger H, Vogt NM, Torres IL, Mirouse V, Koch I, Nüsslein-volhard C, et  
491 al. Bazooka is required for polarisation of the *Drosophila* anterior-posterior axis.  
492 *Development.* 2010;137(10):1765–73.
- 493 42. Huynh JR, Petronczki M, Knoblich JA, St Johnston D. Bazooka and PAR-6 are  
494 required with PAR-1 for the maintenance of oocyte fate in *Drosophila*. *Curr Biol*  
495 *CB.* 2001 Jun 5;11(11):901–6.
- 496 43. Becalska AN, Gavis ER. Bazooka regulates microtubule organization and spatial  
497 restriction of germ plasm assembly in the *Drosophila* oocyte. *Dev Biol.* 2010 Apr  
498 15;340(2):528–38.
- 499 44. Sibon OCM, Stevenson VA, Theurkauf WE. DNA-replication checkpoint control  
500 at the *Drosophila* midblastula transition. *Nature.* 1997 Jul 3;388(6637):93–7.
- 501 45. Yuan K, Seller CA, Shermoen AW, O’Farrell PH. Timing the *Drosophila* Mid-  
502 Blastula Transition: A Cell Cycle-Centered View. *Trends Genet.* 2016 Aug  
503 1;32(8):496–507.
- 504 46. Rose LS, Wieschaus E. The *Drosophila* cellularization gene *nullo* produces a  
505 blastoderm-specific transcript whose levels respond to the nucleocytoplasmic  
506 ratio. *Genes Dev.* 1992 Jul;6(7):1255–68.
- 507 47. Schejter ED, Wieschaus E. *bottleneck* acts as a regulator of the microfilament  
508 network governing cellularization of the *Drosophila* embryo. *Cell.* 1993 Oct  
509 22;75(2):373–85.



510 48. Schweisguth F, Lepasant JA, Vincent A. The serendipity alpha gene encodes a  
511 membrane-associated protein required for the cellularization of the *Drosophila*  
512 embryo. *Genes Dev.* 1990 Jan 6;4(6):922–31.

513 49. Wieschaus E, Sweeton D. Requirements for X-linked zygotic gene activity  
514 during cellularization of early *Drosophila* embryos. *Development.* 1988 Nov  
515 1;104(3):483–93.

516 50. Merrill PT, Sweeton D, Wieschaus E. Requirements for autosomal gene activity  
517 during precellular stages of *Drosophila melanogaster*. *Development.* 1988 Nov  
518 1;104(3):495–509.

519 **Supplemental figures**

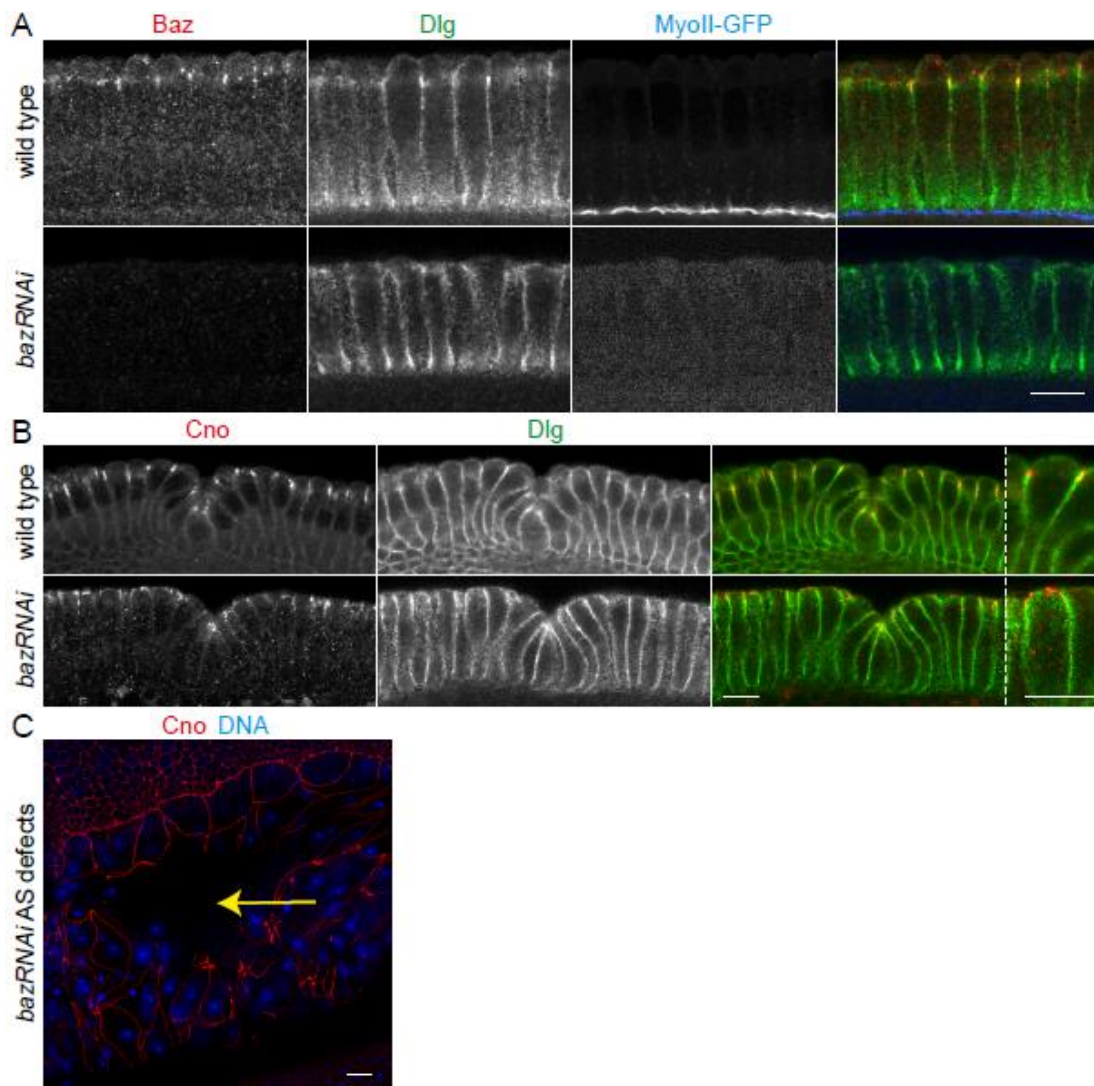

520

521 Supplemental figure 1 Functionality of *bazooka* knock down. (A) Wild typic embryos  
522 expressing MyoII-GFP and *bazRNAi* embryos fixed and stained during late cellularization  
523 againsts Baz (grey/red), Dlg (grey/ green) and MyoGFP (grey/ blue). MyoGFP and *bazRNAi*  
524 embryos were fixed and stained in the same tubes and imaged with same settings. (B) Fixed  
525 wild type and *bazRNAi* embryos during early gastrulation stained against Cno (grey/ red) and  
526 Dlg (grey/ green). (C) Stage 13 *bazRNAi* embryo fixed and stained against Cno (red) and  
527 DNA (blue) showing typical amnioserosa holes (yellow arrow). Scale bars 10  $\mu$ m.

528
